# Supplementary material for: Probing the structure–property–composition relationship in organic–inorganic tri-halide perovskites
Source: Royal Society of Chemistry journal article supplement (doi:10.1039/c8cp01871e), 2018-01-01
Supplement: c8cp01871e1.pdf [file c8cp01871e1.pdf]

## Probing the Structure-Property-Composition Relationship in Organic-Inorganic Tri-halide Perovskites

Julia L. Payne<sup>1\*</sup>, Chengsheng Ni<sup>1</sup>, Jonathon R. Harwell<sup>2</sup>, Lethy Krishnan Jagadamma<sup>2</sup>, Calum McDonald<sup>3</sup>, Davide Mariotti<sup>3</sup>, Ifor D.W. Samuel<sup>2</sup>, John T. S. Irvine<sup>1\*</sup>

<sup>1</sup> School of Chemistry, University of St Andrews, North Haugh, St Andrews, Fife, KY16 9ST, UK. <sup>2</sup> School of Physics and Astronomy, University of St Andrews, North Haugh, St Andrews, Fife, KY16 9SS. UK. <sup>3</sup> School of Engineering, Ulster University, Shore Road, Newtownabbey, Co. Antrim, BT37 0QB, UK

### Supplementary Information

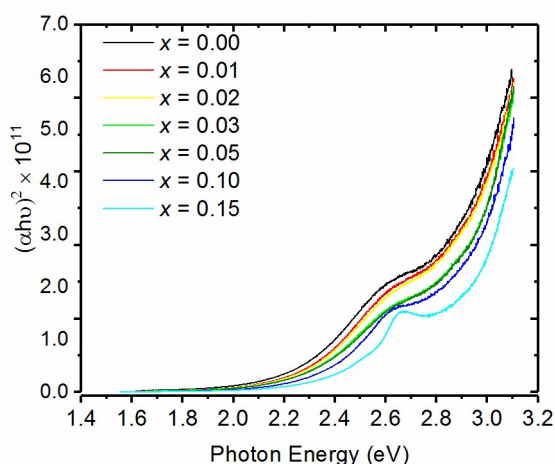

Figure S 1: Tauc plot obtained for the  $(\text{CH}_3\text{NH}_3)_{1-2x}(\text{H}_3\text{NC}_2\text{H}_4\text{NH}_3)_x\text{PbI}_3$  system

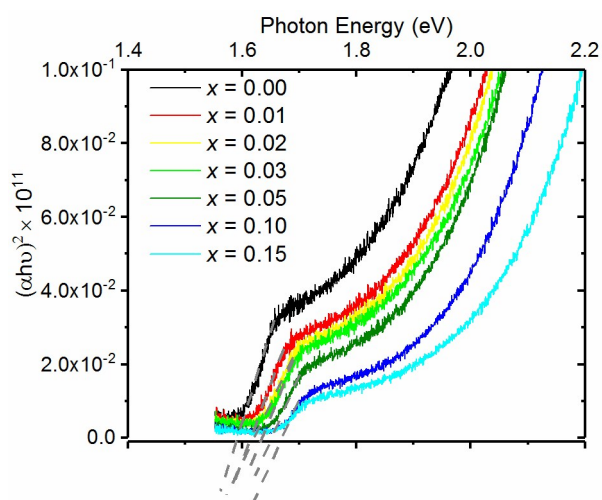

Figure S 2: Zoomed-in region of the Tauc Plot (shown in Figure S 1), showing regions fitted to obtain estimates of band gaps.
